# Supplementary material for: Physical activity levels, duration pattern and adherence to WHO recommendations in German adults
Source: PubMed Central journal article supplement (PMC5330478; doi:10.1371/journal.pone.0172503), 2017-02-28
Supplement: pone.0172503.s003.pdf [file pone.0172503.s003.pdf]

## S1 Tables: Tables A-G.

**Table A.** Comparison of subjects participating in accelerometry compared to all other participants designated to participate in the “Lung health & physical activity” section of the KORA FF4 follow-up (n/N (%)).

| <b>Participating in accelerometry</b> | <b>Yes<br/>(N=562)</b> | <b>No<br/>(N=481)</b> |
|---------------------------------------|------------------------|-----------------------|
| Sex, male                             | 264/562 (47)           | 224/481 (47)          |
| Age, years                            |                        |                       |
| < 55                                  | 189/562 (34)           | 145/481 (30)          |
| 55-61                                 | 201/562 (36)           | 159/481 (33)          |
| > 61                                  | 172/562 (31)           | 177/481 (37)          |
| Working, yes                          | 400/561 (71)           | 317/481 (66)          |
| Education                             |                        |                       |
| Low (< 10 years of school)            | 261/561 (47)           | 238/479 (50)          |
| Medium (= 10 years of school)         | 153/561 (27)           | 117/479 (24)          |
| High (> 10 years of school)           | 147/561 (26)           | 124/479 (26)          |
| Body mass index, kg/m <sup>2</sup>    |                        |                       |
| Normal (< 25)                         | 156/562 (28)           | 154/481 (32)          |
| Overweight (< 30)                     | 245/562 (44)           | 181/481 (38)          |
| Obese (≥ 30)                          | 161/562 (29)           | 146/481 (30)          |
| Overall health (reported)*            |                        |                       |
| Excellent/very good                   | 155/562 (28)           | 102/479 (21)          |
| Good                                  | 346/562 (62)           | 304/479 (63)          |
| Fair/poor                             | 61/562 (11)            | 73/479 (15)           |
| Hypertension, yes                     | 185/561 (33)           | 184/481 (38)          |
| Diabetes, yes                         | 37/561 (7)             | 37/481 (8)            |
| Asthma ever, yes                      | 54/562 (10)            | 47/481 (10)           |
| COPD, yes                             | 48/562 (9)             | 34/480 (7)            |
| Myocardial infarction, yes            | 17/561 (3)             | 14/481 (3)            |
| Stroke, yes                           | 12/562 (2)             | 11/477 (2)            |
| Difficulties in walking               |                        |                       |
| Not at all/slight                     | 523/559 (94)           | 439/479 (92)          |
| Moderate/hard                         | 36/559 (6)             | 40/479 (8)            |
| Pain or physical complaints           |                        |                       |
| Not at all/slight                     | 476/562 (85)           | 388/479 (81)          |
| Moderate/hard                         | 86/562 (15)            | 91/479 (19)           |

| <b>Participating in accelerometry</b> | <b>Yes</b><br>(N=562) | <b>No</b><br>(N=481) |
|---------------------------------------|-----------------------|----------------------|
| Feeling anxious/depressed             |                       |                      |
| Not at all/slight                     | 519/560 (93)          | 439/478 (92)         |
| Moderate/strong                       | 41/560 (7)            | 39/478 (8)           |

\*p < 0.05 in Chi-square test. COPD: Chronic obstructive pulmonary disease.

**Table B.** Median time spent in the three activity levels – sedentary, light and moderate to vigorous (MVPA) stratified by sex.

|                                                                                                                                 | <b>Uniaxial</b> |                | <b>Triaxial</b> |                |
|---------------------------------------------------------------------------------------------------------------------------------|-----------------|----------------|-----------------|----------------|
|                                                                                                                                 | Males           | Females        | Males           | Females        |
|                                                                                                                                 | 47.2 % (224)    | 52.8 % (251)   | 47.2 % (224)    | 52.8 % (251)   |
| <b>Median (25<sup>th</sup>, 75<sup>th</sup> percentile) of minutes per day averaged per subject</b>                             |                 |                |                 |                |
| <b>Sedentary</b>                                                                                                                | 586 (520, 646)* | 529 (473, 587) | 504 (434, 577)* | 435 (376, 498) |
| <b>Light</b>                                                                                                                    | 303 (253, 369)* | 343 (291, 396) | 370 (308, 437)* | 416 (362, 471) |
| <b>MVPA</b>                                                                                                                     | 35 (21, 49)*    | 28 (17, 47)    | 49 (33, 71)*    | 43 (28, 62)    |
| <b>Median % (25<sup>th</sup>, 75<sup>th</sup> percentile) of recorded time spent in each level per day averaged per subject</b> |                 |                |                 |                |
| <b>Sedentary</b>                                                                                                                | 63 (56, 69)*    | 58 (52, 65)    | 54 (47, 62)*    | 48 (42, 55)    |
| <b>Light</b>                                                                                                                    | 32 (27, 40)*    | 38 (33, 44)    | 40 (34, 48)*    | 46 (40, 52)    |
| <b>MVPA</b>                                                                                                                     | 4 (2, 5)*       | 3 (2, 5)       | 5 (4, 8)        | 5 (3, 7)       |

\*p < 0.05 in Wilcoxon rank-sum test (males vs. females).

**Table C.** Median time spent in moderate to vigorous activity stratified either by age tertile or body mass index (BMI) for males and females.

|                                                                                                     |                   | <b>Uniaxial</b>          |                          | <b>Triaxial</b>          |                          |
|-----------------------------------------------------------------------------------------------------|-------------------|--------------------------|--------------------------|--------------------------|--------------------------|
|                                                                                                     |                   | Males                    | Females                  | Males                    | Females                  |
| <b>Median (25<sup>th</sup>, 75<sup>th</sup> percentile) of minutes per day averaged per subject</b> |                   |                          |                          |                          |                          |
| <b>Age, years</b>                                                                                   | < 55              | 35 (24, 57) <sup>1</sup> | 31 (21, 52) <sup>1</sup> | 57 (32, 80) <sup>1</sup> | 45 (32, 65) <sup>1</sup> |
|                                                                                                     | 55 - 61           | 40 (29, 54) <sup>2</sup> | 28 (17, 46)              | 56 (41, 74) <sup>2</sup> | 43 (32, 67)              |
|                                                                                                     | > 61              | 26 (15, 43)              | 21 (10, 42)              | 39 (26, 55)              | 38 (17, 58)              |
| <b>BMI, kg/m<sup>2</sup></b>                                                                        | Normal (< 25)     | 44 (30, 59) <sup>3</sup> | 34 (20, 54) <sup>3</sup> | 55 (39, 79)              | 50 (30, 72) <sup>3</sup> |
|                                                                                                     | Overweight (≥ 25) | 36 (21, 51) <sup>4</sup> | 28 (18, 40) <sup>4</sup> | 49 (32, 70)              | 40 (32, 58)              |
|                                                                                                     | Obese (≥ 30)      | 28 (17, 41)              | 20 (11, 33)              | 43 (32, 63)              | 35 (21, 57)              |

Significant difference ( $p < 0.05$ ) by pairwise Wilcoxon rank-sum test stratified by sex between the categories:

<sup>1</sup> age < 55 and age > 61

<sup>2</sup> age 55-61 and age > 61

<sup>3</sup> normal and obese

<sup>4</sup> overweight and obese

**Table D.** Bout-length of median hours/week spent in moderate to vigorous activity stratified by sex and age.

|                                                                                                                                  | Uniaxial           |                   | Triaxial           |                   |
|----------------------------------------------------------------------------------------------------------------------------------|--------------------|-------------------|--------------------|-------------------|
|                                                                                                                                  | Males              | Females           | Males              | Females           |
| <b>Median hours (25<sup>th</sup>, 75<sup>th</sup> percentile) of MVPA/week</b>                                                   |                    |                   |                    |                   |
| <b>A</b> ≥ 1 min bouts                                                                                                           | 4.00 (2.43, 5.68)* | 3.22 (1.92, 5.4)  | 5.76 (3.78, 8.12)* | 5.02 (3.22, 7.21) |
| ≥ 5 min bouts                                                                                                                    | 1.27 (0.53, 2.95)  | 0.99 (0.35, 2.45) | 1.75 (0.83, 3.42)  | 1.38 (0.64, 2.98) |
| ≥ 10 min bouts                                                                                                                   | 0.59 (0, 1.75)     | 0.35 (0, 1.36)    | 0.70 (0.17, 2.01)  | 0.52 (0, 1.76)    |
| <b>Median % (25<sup>th</sup>, 75<sup>th</sup> percentile) of MVPA/week spent in ≥ 5 and ≥ 10 minute bouts of total MVPA/week</b> |                    |                   |                    |                   |
| <b>B ≥ 5 min bouts</b>                                                                                                           |                    |                   |                    |                   |
| Age, years                                                                                                                       |                    |                   |                    |                   |
| < 55                                                                                                                             | 32 (20, 49)        | 39 (17, 55)       | 32 (21, 42)        | 32 (19, 46)       |
| 55 - 61                                                                                                                          | 30 (19, 55)        | 34 (17, 54)       | 29 (20, 50)        | 28 (17, 46)       |
| > 61                                                                                                                             | 37 (15, 59)        | 34 (12, 54)       | 33 (15, 49)        | 32 (16, 51)       |
| <b>≥ 10 min bouts</b>                                                                                                            |                    |                   |                    |                   |
| Age, years                                                                                                                       |                    |                   |                    |                   |
| < 55                                                                                                                             | 13 (0, 33)         | 12 (0, 38)        | 14 (2, 25)         | 13 (4, 37)        |
| 55 - 61                                                                                                                          | 15 (0, 34)         | 17 (0, 31)        | 11 (4, 29)         | 12 (4, 28)        |
| > 61                                                                                                                             | 17 (0, 37)         | 9 (0, 32)         | 16 (0, 30)         | 10 (0, 32)        |
| <b>% (n) reached WHO recommendation</b>                                                                                          |                    |                   |                    |                   |
|                                                                                                                                  | 16.1 (36)          | 12.0 (30)         | 18.3 (41)          | 15.9 (40)         |

\*p < 0.05 (pairwise) Wilcoxon rank-sum test between (A) males and females, and (B) age categories stratified by sex.

**Table E.** Achieved bout-length applying uniaxial cut-offs.

| <b>% (N) achieved bout of MVPA</b>        | <b>&lt; 10 minutes<sup>1</sup><br/>(N=168)</b> | <b>≥ 10 minutes<sup>2</sup><br/>(N=241)</b> | <b>≥ 10 minutes<br/>+ adherence to WHO<sup>3</sup><br/>(N=66)</b> |
|-------------------------------------------|------------------------------------------------|---------------------------------------------|-------------------------------------------------------------------|
| <b>Sex</b>                                |                                                |                                             |                                                                   |
| Male                                      | 32.1 (72)                                      | 51.8 (116)                                  | 16.1 (36)                                                         |
| Female                                    | 38.2 (96)                                      | 49.8 (125)                                  | 12.0 (30)                                                         |
| <b>Age, years (range: 48 - 68)</b>        |                                                |                                             |                                                                   |
| < 55                                      | 32.9 (51)                                      | 52.3 (81)                                   | 14.8 (23)                                                         |
| 55-61                                     | 31.5 (53)                                      | 52.4 (88)                                   | 16.1 (27)                                                         |
| > 61                                      | 42.1 (64)                                      | 47.4 (72)                                   | 10.5 (16)                                                         |
| <b>Body mass index, kg/m<sup>2</sup>*</b> |                                                |                                             |                                                                   |
| Normal (< 25)                             | 25.5 (35)                                      | 50.4 (69)                                   | 24.1 (33)                                                         |
| Overweight (≥ 25)                         | 35.5 (72)                                      | 53.7 (109)                                  | 10.8 (22)                                                         |
| Obese (≥ 30)                              | 45.2 (61)                                      | 46.7 (63)                                   | 8.1 (11)                                                          |
| <b>Education*</b>                         |                                                |                                             |                                                                   |
| Low (< 10 years of school)                | 45.4 (99)                                      | 45.9 (100)                                  | 8.7 (19)                                                          |
| Medium (= 10 years of school)             | 32.6 (45)                                      | 48.6 (67)                                   | 18.8 (26)                                                         |
| High (> 10 years of school)               | 20.2 (24)                                      | 62.2 (74)                                   | 17.6 (21)                                                         |
| <b>Hypertension*</b>                      |                                                |                                             |                                                                   |
| No                                        | 30.3 (95)                                      | 53.8 (169)                                  | 15.9 (50)                                                         |
| Yes                                       | 45.3 (73)                                      | 44.7 (72)                                   | 9.9 (16)                                                          |
| <b>Diabetes</b>                           |                                                |                                             |                                                                   |
| No                                        | 34.5 (153)                                     | 51.5 (228)                                  | 14.0 (62)                                                         |
| Yes                                       | 46.9 (15)                                      | 40.6 (13)                                   | 12.5 (4)                                                          |
| <b>Asthma</b>                             |                                                |                                             |                                                                   |
| No                                        | 34.1 (146)                                     | 51.4 (220)                                  | 14.5 (62)                                                         |
| Yes                                       | 46.8 (22)                                      | 44.7 (21)                                   | 8.5 (4)                                                           |
| <b>COPD</b>                               |                                                |                                             |                                                                   |
| No                                        | 34.6 (150)                                     | 51.5 (223)                                  | 13.9 (60)                                                         |
| Yes                                       | 42.9 (18)                                      | 42.9 (18)                                   | 14.3 (6)                                                          |
| <b>Difficulties in walking*</b>           |                                                |                                             |                                                                   |
| Not at all/slight                         | 33.7 (150)                                     | 52.1 (232)                                  | 14.2 (63)                                                         |
| Moderate/hard                             | 60.7 (17)                                      | 32.1 (9)                                    | 7.1 (2)                                                           |
| <b>Pain or physical complaints*</b>       |                                                |                                             |                                                                   |
| Not at all/slight                         | 31.5 (128)                                     | 53.2 (216)                                  | 15.3 (62)                                                         |
| Moderate/hard                             | 58.0 (40)                                      | 36.2 (25)                                   | 5.8 (4)                                                           |
| <b>Feeling anxious/depressed</b>          |                                                |                                             |                                                                   |
| Not at all/slight                         | 34.6 (153)                                     | 52.0 (230)                                  | 13.3 (59)                                                         |
| Moderate/strong                           | 43.8 (14)                                      | 34.4 (11)                                   | 21.9 (7)                                                          |

<sup>1</sup>subjects who did not achieve moderate to vigorous activity (MVPA) in bouts of at least 10 minutes. <sup>2</sup>subjects who achieved bouts of at least 10 minutes, but less than 2.5 hours per week. <sup>3</sup>subjects who met the WHO recommendation of 2.5 hours a week in bouts of at least 10 minutes. \*p < 0.05 Chi-square test or Fisher's Exact Test (if cell counts < 5). COPD: Chronic obstructive pulmonary disease.

**Table F.** Count ratios (95% confidence intervals) of triaxial average minutes per day of moderate-to-vigorous physical activity (MVPA), sedentary or light activity estimated by negative binomial regression.

| Outcome                  | Model             | Sedentary                |                                                                                         | Light                    |                                                                                         | MVPA                     |                          |
|--------------------------|-------------------|--------------------------|-----------------------------------------------------------------------------------------|--------------------------|-----------------------------------------------------------------------------------------|--------------------------|--------------------------|
|                          |                   | Basic <sup>1</sup>       | Stepwise <sup>1</sup>                                                                   | Basic <sup>1</sup>       | Stepwise <sup>1</sup>                                                                   | Basic                    | Stepwise                 |
| Variables                |                   |                          |                                                                                         |                          |                                                                                         |                          |                          |
| Sex                      | Female            | -                        | -                                                                                       | -                        | -                                                                                       | -                        | -                        |
|                          | Male              | <b>1.09 (1.05; 1.13)</b> | <b>1.09 (1.05; 1.13)</b>                                                                | <b>0.89 (0.85; 0.92)</b> | <b>0.89 (0.85; 0.92)</b>                                                                | <b>1.18 (1.06; 1.31)</b> | <b>1.18 (1.06; 1.31)</b> |
| Age                      | < 55              | -                        | -                                                                                       | -                        | -                                                                                       | -                        | -                        |
|                          | 55-61             | 0.96 (0.92; 1.00)        | <b>0.95 (0.91; 0.99)</b>                                                                | 1.05 (1.00; 1.10)        | <b>1.05 (1.01; 1.10)</b>                                                                | 1.01 (0.89; 1.15)        | 1.02 (0.90; 1.15)        |
|                          | > 61              | 1.03 (0.98; 1.08)        | 1.04 (0.99; 1.08)                                                                       | 0.99 (0.94; 1.04)        | 0.99 (0.94; 1.04)                                                                       | <b>0.77 (0.67; 0.87)</b> | <b>0.76 (0.67; 0.87)</b> |
| BMI                      | Normal            | -                        | -                                                                                       | -                        | -                                                                                       | -                        | -                        |
|                          | Overweight        | 1.04 (0.99; 1.08)        | <b>1.05 (1.00; 1.09)</b>                                                                | 0.97 (0.93; 1.02)        | 0.96 (0.92; 1.01)                                                                       | <b>0.88 (0.78; 1.00)</b> | <b>0.88 (0.77; 0.99)</b> |
|                          | Obese             | <b>1.11 (1.05; 1.16)</b> | <b>1.12 (1.07; 1.18)</b>                                                                | <b>0.91 (0.86; 0.96)</b> | <b>0.90 (0.85; 0.95)</b>                                                                | <b>0.79 (0.69; 0.91)</b> | <b>0.78 (0.68; 0.90)</b> |
| Education                | Low               | -                        | -                                                                                       | -                        | -                                                                                       | -                        | -                        |
|                          | Medium            | -                        | <b>1.07 (1.02; 1.11)</b>                                                                | -                        | <b>0.93 (0.89; 0.98)</b>                                                                | -                        | 0.97 (0.86; 1.10)        |
|                          | High              | -                        | <b>1.12 (1.07; 1.17)</b>                                                                | -                        | <b>0.90 (0.86; 0.94)</b>                                                                | -                        | <b>0.85 (0.75; 0.97)</b> |
| Pain/physical complaints | Not at all/slight | -                        | -                                                                                       | -                        | -                                                                                       | -                        | -                        |
|                          | Moderate/hard     | -                        | x                                                                                       | -                        | x                                                                                       | -                        | 0.87 (0.75; 1.01)        |
| Diabetes                 | No                | -                        | -                                                                                       | -                        | -                                                                                       | -                        | -                        |
|                          | Yes               | -                        | <b>1.10 (1.02; 1.18)</b>                                                                | -                        | <b>0.90 (0.83; 0.97)</b>                                                                | -                        | x                        |
|                          |                   |                          | [stratified by sex:<br><b>1.18 (1.07; 1.30)</b><br>females; 0.99 (0.89;<br>1.11) males] |                          | [stratified by sex:<br><b>0.81 (0.74; 0.89)</b><br>females; 1.02 (0.90;<br>1.16) males] |                          |                          |



Significant associations ( $p < 0.05$ ) are shown in bold. Basic model was adjusted for sex, age, and body mass index (BMI). Besides sex, age, and BMI considered variables in the stepwise selection model were: season, education, hypertension, diabetes, asthma, chronic obstructive pulmonary disease (COPD), difficulties with walking, pain or physical complaints, and anxiety/depression. Models with the lowest Akaike information criterion (AIC) are shown. <sup>1</sup>Model additionally adjusted for average recorded wear time/day. <sup>x</sup>Covariate did not remain in main model.

**Table G.** Achieved bout-length applying triaxial cut-offs.

| <b>% (N) achieved bout of MVPA</b>         | <b>&lt; 10 minutes<sup>1</sup><br/>(N=116)</b> | <b>≥ 10 minutes<sup>2</sup><br/>(N=278)</b> | <b>≥ 10 minutes<br/>+ adherence to WHO<sup>3</sup><br/>(N=81)</b> |
|--------------------------------------------|------------------------------------------------|---------------------------------------------|-------------------------------------------------------------------|
| <b>Sex</b>                                 |                                                |                                             |                                                                   |
| Male                                       | 23.2 (52)                                      | 58.5 (131)                                  | 18.3 (41)                                                         |
| Female                                     | 25.5 (64)                                      | 58.6 (147)                                  | 15.9 (40)                                                         |
| <b>Age, years (range: 48 - 68)</b>         |                                                |                                             |                                                                   |
| < 55                                       | 23.9 (37)                                      | 58.1 (90)                                   | 18.1 (28)                                                         |
| 55-61                                      | 19.6 (33)                                      | 61.3 (103)                                  | 19.0 (32)                                                         |
| > 61                                       | 30.3 (46)                                      | 55.9 (85)                                   | 13.8 (21)                                                         |
| <b>Body mass index, kg/m<sup>2</sup> *</b> |                                                |                                             |                                                                   |
| Normal (< 25)                              | 17.5 (24)                                      | 54.7 (75)                                   | 27.7 (38)                                                         |
| Overweight (≥ 25)                          | 26.6 (54)                                      | 59.6 (121)                                  | 13.8 (28)                                                         |
| Obese (≥ 30)                               | 28.1 (38)                                      | 60.7 (82)                                   | 11.1 (15)                                                         |
| <b>Education*</b>                          |                                                |                                             |                                                                   |
| Low (< 10 years of school)                 | 29.8 (65)                                      | 57.3 (125)                                  | 12.8 (28)                                                         |
| Medium (= 10 years of school)              | 24.6 (34)                                      | 53.6 (74)                                   | 21.7 (30)                                                         |
| High (> 10 years of school)                | 14.3 (17)                                      | 66.4 (79)                                   | 19.3 (23)                                                         |
| <b>Hypertension,</b>                       |                                                |                                             |                                                                   |
| No                                         | 22.3 (70)                                      | 58.3 (183)                                  | 19.4 (61)                                                         |
| Yes                                        | 28.6 (46)                                      | 59.0 (95)                                   | 12.4 (20)                                                         |
| <b>Diabetes,</b>                           |                                                |                                             |                                                                   |
| No                                         | 23.3 (103)                                     | 59.6 (264)                                  | 17.2 (76)                                                         |
| Yes                                        | 40.6 (13)                                      | 43.8 (14)                                   | 15.6 (5)                                                          |
| <b>Asthma,</b>                             |                                                |                                             |                                                                   |
| No                                         | 23.4 (100)                                     | 59.1 (253)                                  | 17.5 (75)                                                         |
| Yes                                        | 34.0 (16)                                      | 53.2 (25)                                   | 12.8 (6)                                                          |
| <b>COPD,</b>                               |                                                |                                             |                                                                   |
| No                                         | 23.6 (102)                                     | 59.4 (257)                                  | 17.1 (74)                                                         |
| Yes                                        | 33.3 (14)                                      | 50.0 (21)                                   | 16.7 (7)                                                          |
| <b>Difficulties in walking*</b>            |                                                |                                             |                                                                   |
| Not at all/slight                          | 22.9 (102)                                     | 59.6 (265)                                  | 17.5 (78)                                                         |
| Moderate/hard                              | 50.0 (14)                                      | 42.9 (12)                                   | 7.1 (2)                                                           |
| <b>Pain or physical complaints*</b>        |                                                |                                             |                                                                   |
| Not at all/slight                          | 22.4 (91)                                      | 58.6 (238)                                  | 19.0 (77)                                                         |
| Moderate/hard                              | 36.2 (25)                                      | 58.0 (40)                                   | 5.8 (4)                                                           |
| <b>Feeling anxious/depressed</b>           |                                                |                                             |                                                                   |
| Not at all/slight                          | 24.2 (107)                                     | 59 (261)                                    | 16.7 (74)                                                         |
| Moderate/strong                            | 25.0 (8)                                       | 53.1 (17)                                   | 21.9 (7)                                                          |

<sup>1</sup>subjects who did not achieve moderate to vigorous activity (MVPA) in bouts of at least 10 minutes. <sup>2</sup>subjects who achieved bouts of at least 10 minutes, but less than 2.5 hours per week. <sup>3</sup>subjects who met the WHO recommendation of 2.5 hours a week in bouts of at least 10 minutes. \*p < 0.05 Chi-square test or Fisher's Exact Test (if cell counts < 5). COPD: Chronic obstructive pulmonary disease.
